# Supplementary material for: Symbioses are restructured by repeated mass coral bleaching
Source: PubMed Central journal article supplement — Sci Adv. 2022 Dec 7;8(49):eabq8349. doi: 10.1126/sciadv.abq8349 (PMC9728966; doi:10.1126/sciadv.abq8349), 2022-12-07
Supplement: sciadv.abq8349_sm.pdf [file sciadv.abq8349_sm.pdf]

Supplementary Materials for  
**Symbioses are restructured by repeated mass coral bleaching**

Kate M. Quigley *et al.*

Corresponding author: Kate M. Quigley, [katemarie.quigley@my.jcu.edu.au](mailto:katemarie.quigley@my.jcu.edu.au)

*Sci. Adv.* **8**, eabq8349 (2022)  
DOI: 10.1126/sciadv.abq8349

**This PDF file includes:**

Figs. S1 to S4  
Tables S1 to S12

## Supplementary Figures

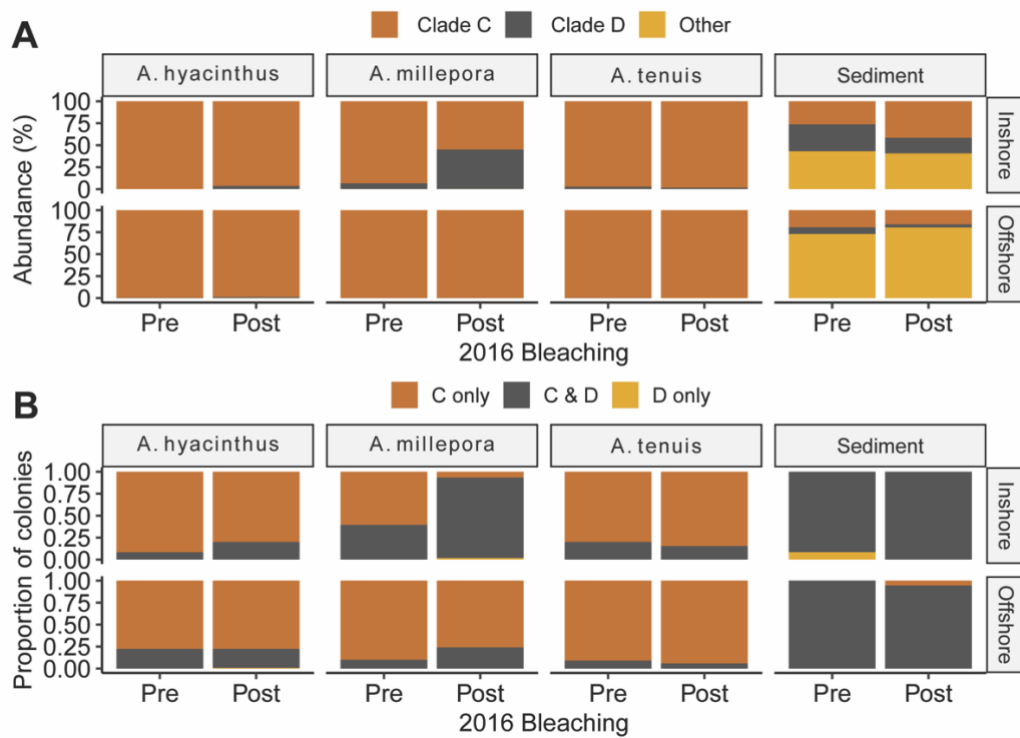

**Fig. S1.**

(A) average abundance of *Cladocopium* and *Durusdinium* in each sample source between inshore and offshore locations. (B) proportion of samples in each source that contain only *Cladocopium*, *Cladocopium* and *Durusdinium*, or only *Durusdinium* between inshore and offshore locations.

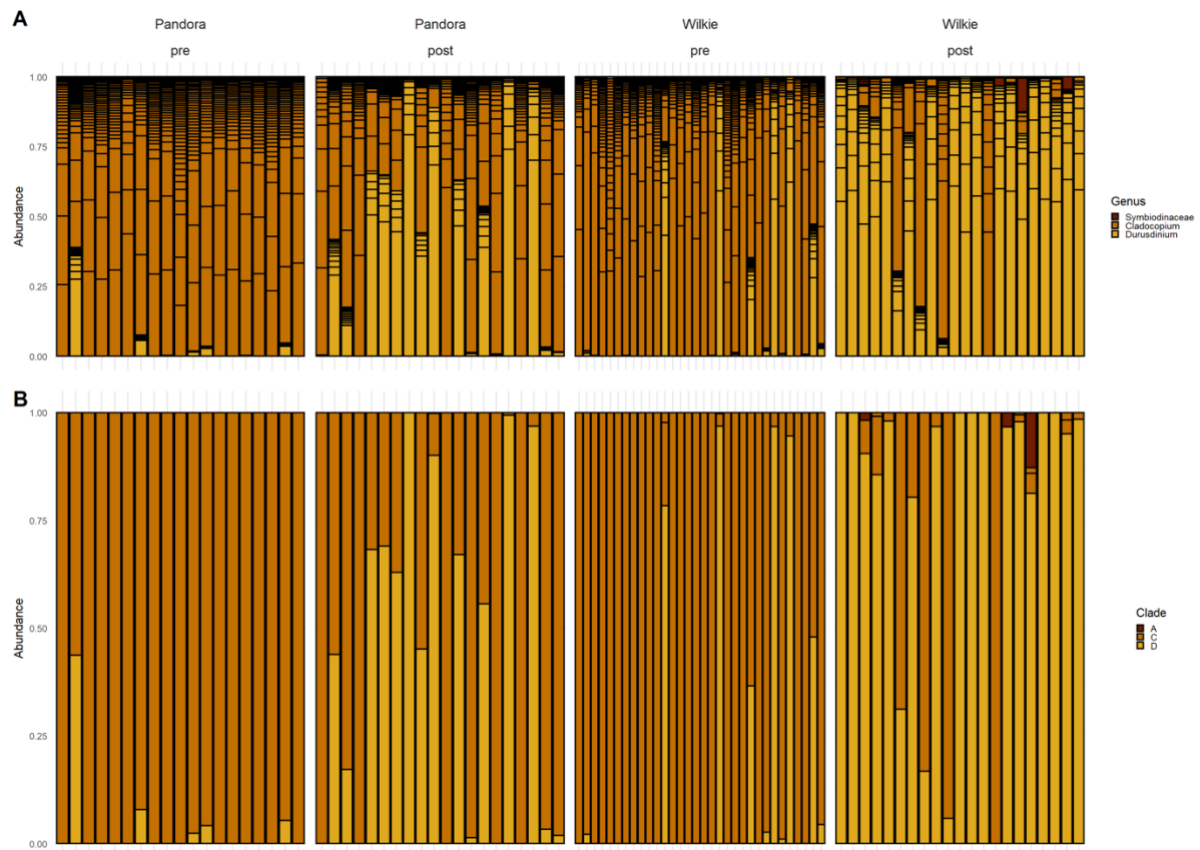

**Fig. S2.**

Secondary approach to assess Symbiodiniaceae community diversity using the Defining Intragenomic Variants approach (DIV) from the SymPortal pipeline. The DIV approach was applied to an informative subset of highly variable reefs and timepoints for our most variable species - *A. millepora*. **(A)** average abundance per individual sample of DIVs coloured at the genus level for *Symbiodinium*, *Cladocopium* and *Durusdinium* in *A. millepora* between pre and post locations at two reef sites. **(B)** average abundance of DIVs per individual sample grouped and coloured at the clade level (A,C,D). This comparison confirmed both approaches render comparable interpretations, especially at the clade level, specifically in which the relative proportion of *Cladocopium* was lower in pre samples and replaced by *Durusdinium* in the post samples. The corresponding bars averaged at the reef level (compared to at the individual sample level) are bars 4 and 9 on Fig. 2 (left to right). When averaged over all individuals sampled on each reef, the relative proportions were similar for ASVs (Pandora - pre: ~3%, post: ~25%; Wilkie - ~15%, ~75%; Fig. 2) compared to DIVs (Pandora - pre: ~5%, post: ~40%; Wilkie - ~13%, ~80%).

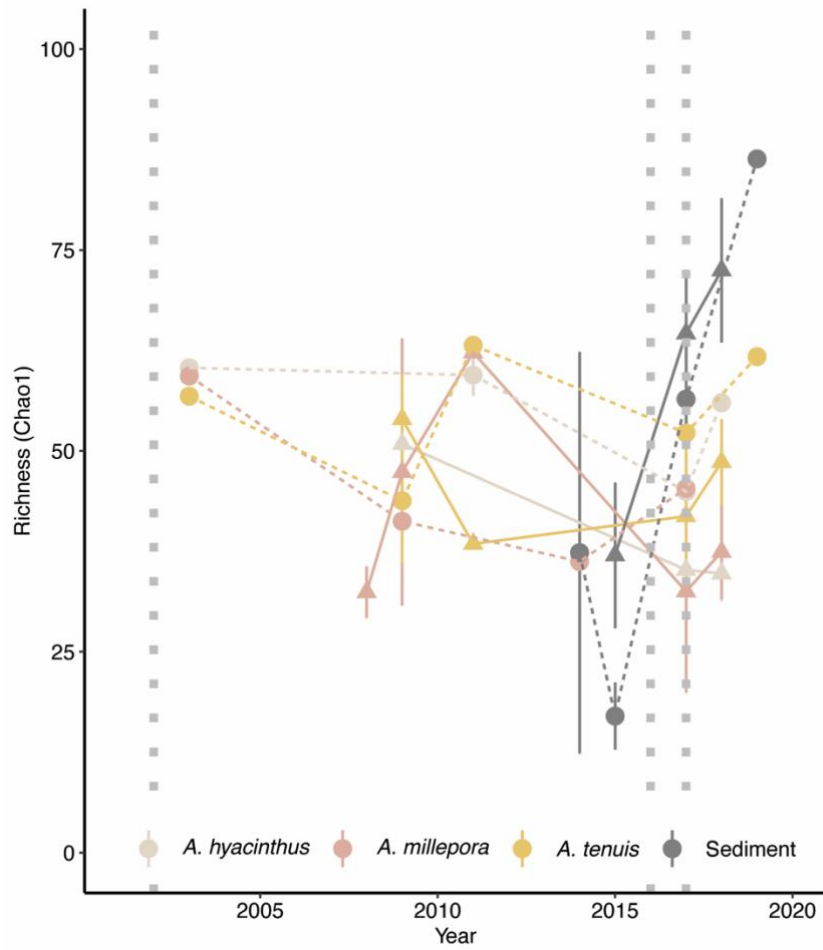

**Fig. S3.**  
**Changes in Symbiodiniaceae richness in coral and sediment samples collected along reefs from the northern and central Great Barrier Reef pre- and post-2016 mass bleaching.**  
 The mean  $\pm$  standard deviation of the Chao1 richness of Amplicon Sequence Variants - ASVs from 2003 to 2019 collected from reefs coloured by sample type.

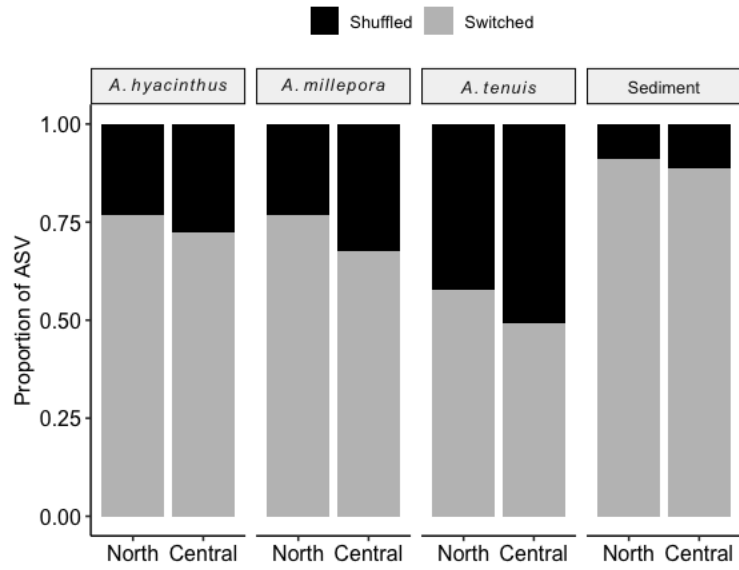

**Fig. S4.** Proportion of Amplicon Sequence Variants (ASVs) that either shuffled or switched for each sample type in either the northern or central Great Barrier Reef.

## Supplementary Tables

| Sector  | Reef            | <i>A. hyacinthus</i> |      | <i>A. millepora</i> |      | <i>A. tenuis</i> |      | Environment |      |
|---------|-----------------|----------------------|------|---------------------|------|------------------|------|-------------|------|
|         |                 | Pre                  | Post | Pre                 | Post | Pre              | Post | Pre         | Post |
| North   | Curd            | 12                   | 20   |                     | 35   | 35               | 35   |             | 7    |
|         | Great Detached  | 30                   | 35   |                     |      | 35               | 35   | 3           | 6    |
|         | Long Sandy      |                      | 35   |                     | 5    | 30               | 35   |             | 3    |
|         | SandBank7       | 29                   | 38   |                     | 8    | 34               | 36   |             | 3    |
|         | Tydeman         | 30                   | 17   | 7                   | 4    | 35               | 16   | 3           |      |
|         | Wallace         |                      |      | 40                  | 11   | 35               | 29   | 3           | 3    |
|         | Wilkie          |                      |      | 35                  | 28   | 35               | 26   | 3           | 2    |
| Central | Arlington       |                      |      |                     |      |                  |      |             | 7    |
|         | Backnumbers     |                      | 36   |                     |      |                  | 29   |             |      |
|         | Coates          |                      |      |                     |      |                  |      |             | 13   |
|         | Davies          | 29                   | 34   | 30                  | 35   | 10               | 30   | 3           | 3    |
|         | Dunk            |                      |      |                     |      |                  |      |             | 12   |
|         | Farquharson     |                      |      |                     |      |                  |      |             | 9    |
|         | Feather         |                      |      |                     |      |                  |      |             | 12   |
|         | Fitzroy Island  |                      |      |                     |      |                  |      |             | 6    |
|         | Geoffrey Bay    |                      |      |                     |      |                  |      | 3           | 3    |
|         | Havannah Island |                      |      |                     |      |                  |      |             | 9    |
|         | John Brewer     | 30                   | 15   |                     |      | 35               | 20   |             | 7    |
|         | North Barnard   |                      |      |                     |      |                  |      |             | 6    |
|         | Orpheus         |                      |      |                     |      |                  |      | 3           |      |
|         | Pandora         |                      |      | 19                  | 20   | 35               | 21   | 3           | 9    |
|         | Peart           |                      |      |                     |      |                  |      |             | 14   |
|         | Rib             |                      |      | 33                  | 11   | 33               | 15   | 3           | 9    |
|         | Russell         |                      |      |                     |      |                  |      |             | 10   |
| Taylor  |                 |                      |      |                     |      |                  |      | 9           |      |
| Trunk   | 30              |                      |      |                     | 34   |                  |      |             |      |
| Total   |                 | 190                  | 230  | 164                 | 157  | 386              | 327  | 27          | 162  |

**Table S1.**

Total number of individual coral or environmental samples processed per reef location.

| Factor           | Df   | Sum sq. | $R^2$ | pseudo-F | <i>p-value</i> |
|------------------|------|---------|-------|----------|----------------|
| Sample source    | 3    | 28.7    | 0.08  | 54.7     | <0.001         |
| Inshore/Offshore | 1    | 69.8    | 0.2   | 398.9    | <0.001         |
| North/Central    | 1    | 5.4     | 0.01  | 31.2     | <0.001         |
| Bleaching        | 1    | 3.9     | 0.01  | 22.7     | <0.001         |
| Residual         | 1291 | 226.14  | 0.65  |          |                |

**Table S2.**

Permutational Multivariate Analysis of Variance (PERMANOVA) results for main effects (north/central; inshore/offshore; bleaching: pre-2016 or post-2016) on each sample source (coral species/environment). The table includes a list of the main effects and (Factor), degrees of freedom (Df), sum of squares (Sum squares), coefficient of determination ( $R^2$ ), pseudo-F statistic, and p-value (*p*). Analysis includes only paired reefs that had samples from “pre” and “post” the 2016 bleaching.

| Factor                     | Df  | Sum sq. | $R^2$ | pseudo-F | $p$ -value |
|----------------------------|-----|---------|-------|----------|------------|
| <i>Acropora hyacinthus</i> |     |         |       |          |            |
| Inshore/Offshore           | 1   | 9.56    | 0.16  | 71.6     | <0.001     |
| North/Central              | 1   | 1.4     | 0.02  | 10.9     | <0.001     |
| Bleaching                  | 1   | 4.4     | 0.07  | 33.4     | <0.001     |
| Residual                   | 315 | 42.0    | 0.71  |          |            |
| <i>Acropora millepora</i>  |     |         |       |          |            |
| Inshore/Offshore           | 1   | 10.8    | 0.14  | 57.2     | <0.001     |
| North/Central              | 1   | 2.5     | 0.03  | 13.4     | <0.001     |
| Bleaching                  | 1   | 7.2     | 0.09  | 38.0     | <0.001     |
| Residual                   | 269 | 50.8    | 0.67  |          |            |
| <i>Acropora tenuis</i>     |     |         |       |          |            |
| Inshore/Offshore           | 1   | 59.0    | 0.39  | 435.8    | <0.001     |
| North/Central              | 1   | 4.6     | 0.03  | 34.0     | <0.001     |
| Bleaching                  | 1   | 0.91    | 0.006 | 6.73     | <0.001     |
| Residual                   | 646 | 87.57   | 0.57  |          |            |
| Environment                |     |         |       |          |            |
| Inshore/Offshore           | 1   | 2.59    | 0.11  | 7.59     | <0.001     |
| North/Central              | 1   | 0.96    | 0.04  | 2.82     | <0.001     |
| Bleaching                  | 1   | 0.75    | 0.03  | 2.20     | <0.003     |
| Residual                   | 52  | 17.76   | 0.80  |          |            |

**Table S3.**

Permutational Multivariate Analysis of Variance (PERMANOVA) results for main effects (north/central; inshore/offshore; bleaching: pre-2016 or post-2016) on each sample source. The table includes a list of the main effects and (Factor), degrees of freedom (Df), sum of squares (Sum squares), coefficient of determination ( $R^2$ ), pseudo-F statistic, and  $p$ -value ( $p$ ). Analysis includes only paired reefs that had samples “pre” and “post” the 2016 bleaching.



| Species              | Sector   | Region  | Pre $\pm$ SE    | Pre n | Post $\pm$ SE   | Post n |
|----------------------|----------|---------|-----------------|-------|-----------------|--------|
| <i>A. hyacinthus</i> | Inshore  | North   | 0.5 $\pm$ 0.5   | 12    | 3.5 $\pm$ 3.4   | 20     |
|                      |          | Central | NA              | 0     | NA              | 0      |
|                      | Offshore | North   | 0.3 $\pm$ 0.3   | 89    | 1.5 $\pm$ 1.1   | 90     |
|                      |          | Central | 0.3 $\pm$ 0.05  | 59    | 0.2 $\pm$ 0.05  | 49     |
| <i>A. millepora</i>  | Inshore  | North   | 7.3 $\pm$ 2.24  | 75    | 53.8 $\pm$ 6.2  | 39     |
|                      |          | Central | 3.3 $\pm$ 1.3   | 19    | 27.8 $\pm$ 6.7  | 20     |
|                      | Offshore | North   | 0.05 $\pm$ 0.05 | 7     | 0.4 $\pm$ 0.1   | 4      |
|                      |          | Central | 0.09 $\pm$ 0.04 | 63    | 0.16 $\pm$ 0.06 | 46     |
| <i>A. tenuis</i>     | Inshore  | North   | 3.6 $\pm$ 1.1   | 105   | 1.4 $\pm$ 0.5   | 90     |
|                      |          | Central | 0 $\pm$ 0       | 35    | 2.1 $\pm$ 1.3   | 21     |
|                      | Offshore | North   | 0.3 $\pm$ 0.2   | 134   | 0.02 $\pm$ 0.02 | 122    |
|                      |          | Central | 0.2 $\pm$ 0.1   | 78    | 0.06 $\pm$ 0.02 | 65     |
| Environment          | Inshore  | North   | 21.1 $\pm$ 5.6  | 6     | 6.8 $\pm$ 3.2   | 5      |
|                      |          | Central | 40.1 $\pm$ 4.7  | 6     | 22.4 $\pm$ 1.7  | 12     |
|                      | Offshore | North   | 5.1 $\pm$ 0.8   | 3     | 2.8 $\pm$ 0.8   | 6      |
|                      |          | Central | 8.8 $\pm$ 3.4   | 6     | 3.7 $\pm$ 0.7   | 12     |

**Table S4.**

Relative abundance (%) of *Durusdinium* in samples taken before and after the 2016 bleaching event.

| Rank | <i>A. hyacinthus</i> | <i>A. millepora</i> | <i>A. tenuis</i> | Environment |
|------|----------------------|---------------------|------------------|-------------|
| 1    | C3k (7.1)            | Cspc (6.0)          | Cspc (4.7)       | C1m (3.4)   |
| 2    | C3k (5.4)            | C3k (5.8)           | C1m (3.8)        | D1 (3.3)    |
| 3    | Cspc (5.2)           | C3k (4.9)           | C3k (3.7)        | A10 (2.3)   |
| 4    | C3k (2.7)            | C3k (4.2)           | C3k (3.5)        | D1a (3.0)   |
| 5    | C3k (2.0)            | C-NA (2.0)          | C50 (1.9)        | Cspc (1.8)  |
| 6    | C3k (2.0)            | C3j (1.7)           | C1c.C45 (1.9)    | I4 (1.5)    |
| 7    | C3k (1.9)            | C3k (1.7)           | C1m (1.7)        | A4.3 (1.5)  |
| 8    | C29 (1.9)            | C- NA (1.6)         | C-NA (1.7)       | A15c (1.5)  |
| 9    | C3k (1.8)            | C3.11 (1.6)         | C29 (1.7)        | I-NA (1.2)  |
| 10   | C3k (1.6)            | C45.3 (1.6)         | C3k (1.7)        | I3 (1.0)    |

**Table S5.**

The mean normalized abundance and identity of the top-10 most abundant ASV in each sample source. Means in parentheses (%) were calculated using the mean abundance of each ASV on each reef. Where the ASV sequence did not match a published Symbiodiniaceae sequence, the ASV identity is reported as Genus-NA.

| Sample source        | Region  | Pre-2016<br>(n samples) | Post-2016<br>(n samples) |
|----------------------|---------|-------------------------|--------------------------|
| <i>A. hyacinthus</i> | North   | 54.2±1.3 (101)          | 36.6±1.2 (145)           |
|                      | Central | 59.7±1.2 (89)           | 44.0±1.5 (85)            |
| <i>A. millepora</i>  | North   | 31.6±1.3 (82)           | 26.4±1.7 (91)            |
|                      | Central | 46.6±1.5 (82)           | 47.0±1.6 (66)            |
| <i>A. tenuis</i>     | North   | 51.5±0.9 (239)          | 45.3±0.9 (212)           |
|                      | Central | 49.1±1.2 (147)          | 56.5±1.6 (115)           |
| Environment          | North   | 37±5.2 (12)             | 67.5±3.4 (24)            |
|                      | Central | 21.8±3.5 (26)           | 57.5±1.9 (138)           |

**Table S6.**

Changes in the mean  $\pm$  Standard Error of the community richness metric Chao1 of Symbiodiniaceae Amplicon Sequence Variants. Sample sizes of each group is given within parenthesis.

| Factor               | Df | Sum sq. | pseudo-F | <i>p-value</i> |
|----------------------|----|---------|----------|----------------|
| <i>A. hyacinthus</i> |    |         |          |                |
| Region               | 1  | 463.7   | 6.84     | 0.1311         |
| Bleaching            | 1  | 20464.1 | 129.8    | <2e-16         |
| Region*Bleaching     | 1  | 146.9   | 400.3    | 0.3349         |
| <i>A. millepora</i>  |    |         |          |                |
| Region               | 1  | 86.12   | 0.6858   | 0.4359085      |
| Bleaching            | 1  | 1511.58 | 12.0379  | 0.0005939      |
| Region*Bleaching     | 1  | 698.63  | 5.5638   | 0.0189455      |
| <i>A. tenuis</i>     |    |         |          |                |
| Region               | 1  | 48.3    | 0.5999   | 0.4549         |
| Bleaching            | 1  | 60.2    | 0.7473   | 0.3876         |
| Region*Bleaching     | 1  | 4253.8  | 52.8109  | 9.777e-13      |
| Environment          |    |         |          |                |
| Region               | 1  | 1381.5  | 5.4674   | 0.02755        |
| Bleaching            | 1  | 21516.0 | 85.1538  | < 2e-16        |
| Region*Bleaching     | 1  | 742.0   | 2.9367   | 0.08817        |

**Table S7.**

Summary of significance tests of symbiont community richness, as measured by changes in the Chao1 metric. Tests were run using the *lmer* function, with region and bleaching time as fixed effects and reef as a random effect.

| Sample source        | Region  | Pre-2016<br>(n samples) | Post-2016<br>(n samples) |
|----------------------|---------|-------------------------|--------------------------|
| <i>A. hyacinthus</i> | North   | 54.1±1.34 (101)         | 36.7±1.2 (145)           |
|                      | Central | 59.7±1.29 (89)          | 44.0±1.55 (85)           |
| <i>A. millepora</i>  | North   | 31.5±1.37 (82)          | 26.4±1.71 (91)           |
|                      | Central | 46.7±1.58 (82)          | 47.1±1.6 (66)            |
| <i>A. tenuis</i>     | North   | 51.4±0.941 (239)        | 45.3±0.91 (212)          |
|                      | Central | 49.0±1.28 (147)         | 56.5±1.61 (115)          |
| Environment          | North   | 36.6±5.24 (12)          | 67.5±3.45 (24)           |
|                      | Central | 28.7.7±5.28 (15)        | 57.5±1.93 (138)          |

**Table S8.**

Changes in the mean diversity (number of Amplicon Sequence Variants) per sample ± Standard Error of community diversity of Symbiodiniaceae. Samples size (n) of each group is given within parenthesis.

| Factor                     | Df | Chi sq. | <i>p</i> -value |
|----------------------------|----|---------|-----------------|
| <i>Acropora hyacinthus</i> |    |         |                 |
| Region                     | 1  | -2.04   | 0.0414          |
| Bleaching                  | 1  | -13.2   | <2e-16          |
| Region*Bleaching           | 1  | 0.988   | 0.322           |
| <i>Acropora millepora</i>  |    |         |                 |
| Region                     | 1  | 0.218   | 0.798           |
| Bleaching                  | 1  | -1.35   | 0.176           |
| Region*Bleaching           | 1  | -6.19   | 6.0e-10         |
| <i>Acropora tenuis</i>     |    |         |                 |
| Region                     | 1  | 0.081   | 0.936           |
| Bleaching                  | 1  | 4.84    | 1.2e-6          |
| Region*Bleaching           | 1  | -9.36   | <2e-16          |
| Environment                |    |         |                 |
| Region                     | 1  | 2.3     | 0.0211          |
| Bleaching                  | 1  | 13.96   | <2e-16          |
| Region*Bleaching           | 1  | -1.19   | 0.232           |

**Table S9.**

Summary of significance tests of symbiont community diversity, as measured by changes in the number of Amplicon Sequence Variants per sample. Tests were run using the *glmer* function, with region and bleaching time as fixed effects and reef as a random effect using a Poisson distribution.

| Factor                     | Df  | Sum sq. | $R^2$ | pseudo-F | <i>p</i> -value |
|----------------------------|-----|---------|-------|----------|-----------------|
| <i>Acropora hyacinthus</i> |     |         |       |          |                 |
| Inshore/Offshore           | 1   | 5.8     | 0.14  | 34.1     | <0.001          |
| North/Central              | 1   | 0.9     | 0.02  | 5.8      | <0.001          |
| Bleaching                  | 1   | 2.8     | 0.06  | 16.4     | <0.001          |
| Residual                   | 185 | 31.5    | 0.17  |          |                 |
| <i>Acropora millepora</i>  |     |         |       |          |                 |
| Inshore/Offshore           | 1   | 10.2    | 0.24  | 54.2     | <0.001          |
| North/Central              | 1   | 3.8     | 0.09  | 20.3     | <0.001          |
| Bleaching                  | 1   | 3.6     | 0.08  |          | <0.001          |
| Residual                   | 128 | 50.8    | 0.57  |          |                 |
| <i>Acropora tenuis</i>     |     |         |       |          |                 |
| Inshore/Offshore           | 1   | 40.1    | 0.44  | 315.0    | <0.001          |
| North/Central              | 1   | 2.0     | 0.02  | 15.9     | <0.001          |
| Bleaching                  | 1   | 2.2     | 0.02  | 17.2     | <0.001          |
| Residual                   | 363 | 46.2    | 0.51  |          |                 |
| Environment                |     |         |       |          |                 |
| Inshore/Offshore           | 1   | 2.56    | 0.11  | 7.4      | <0.001          |
| North/Central              | 1   | 0.96    | 0.04  | 2.8      | <0.001          |
| Bleaching                  | 1   | 0.80    | 0.03  | 2.3      | <0.001          |
| Residual                   | 52  | 17.76   | 0.80  |          |                 |

**Table S10.**

Permutational Multivariate Analysis of Variance (PERMANOVA) for a subset of years (2011-2019) results for main effects (north/central; inshore/offshore; for each sample source). The table includes a list of the main effects (Factor), degrees of freedom (Df), sum of squares (Sum squares), coefficient of determination ( $R^2$ ), pseudo-F statistic, and *p*-value (*p*).

|                      | Factor   | Df | Sum sq. | Mean sq. | F     | <i>p</i> -value |
|----------------------|----------|----|---------|----------|-------|-----------------|
| <i>A. hyacinthus</i> | Category | 3  | 2.6     | 0.87     | 33.7  | <0.001          |
| <i>A. millepora</i>  | Category | 2  | 2.1     | 1.08     | 28.7  | <0.001          |
| <i>A. tenuis</i>     | Category | 3  | 7.21    | 2.4      | 109.3 | <0.001          |
| Environment          | Category | 3  | 0.05    | 0.01     | 6.03  | <0.001          |

**Table S11.**

Permutation test results for homogeneity of multivariate dispersions for variance normalized relative abundances of Symbiodiniaceae communities for each sample source (coral species/environment) by bleaching category (LL, LH, HH, HL). The table includes a list of the main effects (Factor), degrees of freedom (Df), sum of squares (Sum squares), mean squares (mean sq.), F statistic (F), and p-value (*p*), with all tests using *n* = 999 number of permutations.



| Sample source        | Factor   | Df | Sum sq. | $R^2$ | F    | $p$ -value |
|----------------------|----------|----|---------|-------|------|------------|
| <i>A. hyacinthus</i> | Category | 3  | 5.23    | 0.07  | 10.4 | <0.001     |
| <i>A. millepora</i>  | Category | 2  | 13.1    | 0.17  | 28.8 | <0.001     |
| <i>A. tenuis</i>     | Category | 3  | 18.60   | 0.13  | 34.9 | <0.001     |
| Environment          | Category | 3  | 4.02    | 0.09  | 4.3  | <0.001     |

**Table S12.**

Permutational Multivariate Analysis of Variance (PERMANOVA) results for variance normalized relative abundances of Symbiodiniaceae communities for each sample source (coral species/environment) by bleaching category (LL, LH, HH, HL). The table includes a list of the main effects (Factor), degrees of freedom (Df), sum of squares (Sum squares), coefficient of determination ( $R^2$ ), Model F-value (F), and p-value ( $p$ ). Analysis includes only paired reefs that had samples “pre” and “post” the 2016 bleaching.
